# Supplementary material for: A novel fluorescence sensor for relay recognition of zinc ions and nitric oxide through fluorescence ‘off–on–off’ functionality
Source: Royal Society of Chemistry journal article supplement (doi:10.1039/d0nj05018k), 2020-12-17
Supplement: d0nj05018k1.pdf [file d0nj05018k1.pdf]

## Electronic Supplementary Information (ESI)

# A Novel Fluorescence Sensor for Relay Recognition of Zinc Ion and Nitric Oxide through Fluorescence 'Off-on-off' Functionality

Jie Mou <sup>a,b,\*</sup>, Hao Qi <sup>b,#</sup>, Rui Xiang <sup>a,#</sup>, Shaofeng Xu <sup>b</sup>, Jie Liu <sup>a</sup>, Sihan Meng <sup>b</sup>, Ninghai Chen <sup>b</sup>, Yunsheng Xue <sup>a,b</sup>, Dongsheng Pei <sup>c,\*</sup>

### 1. Structure characterization of the Probe LJ-1

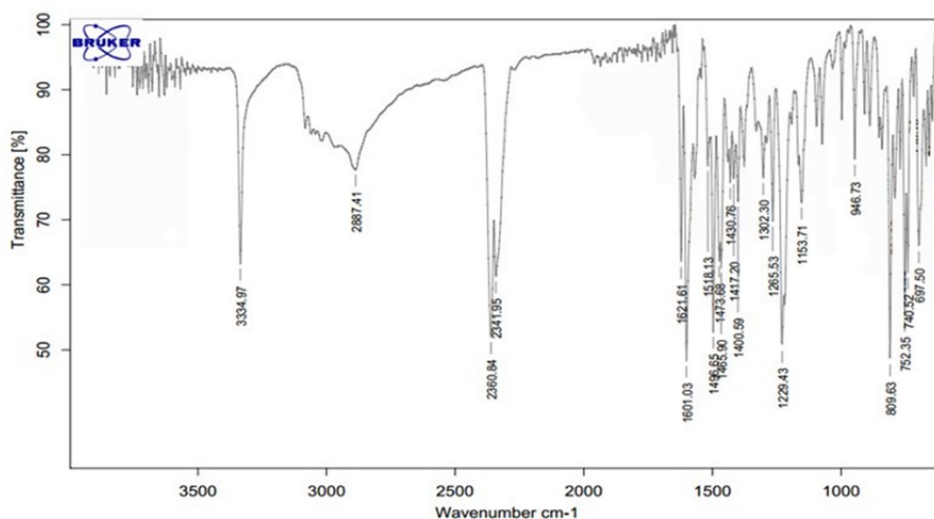

Fig. S1a IR spectrum of LJ-1

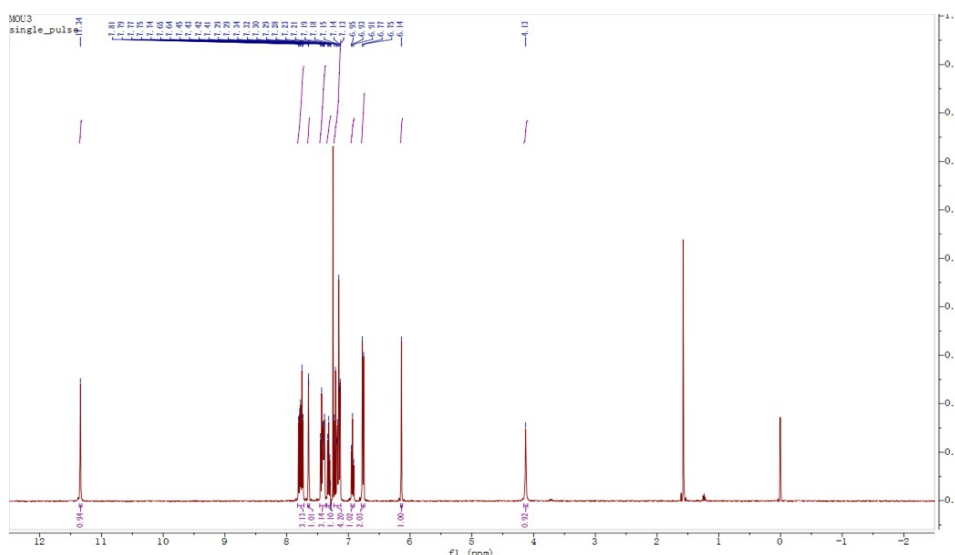

Fig. S1b <sup>1</sup>H NMR spectrum of LJ-1



### 3. Time effect on LJ-1/ $\text{Zn}^{2+}$ complex

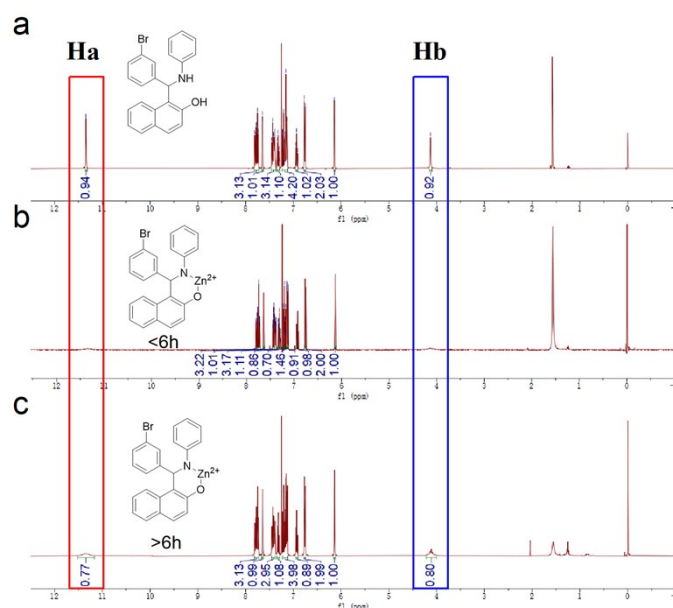

Fig. S3 Time-dependent effects on  $^1\text{H}$  NMR characterization. a) LJ-1; b) LJ-1/ $\text{Zn}^{2+}$  complex within 6 h; c) LJ-1/ $\text{Zn}^{2+}$  complex after 6 h.

### 4. The proposed binding mode of NO to LJ-1/ $\text{Zn}^{2+}$ complex

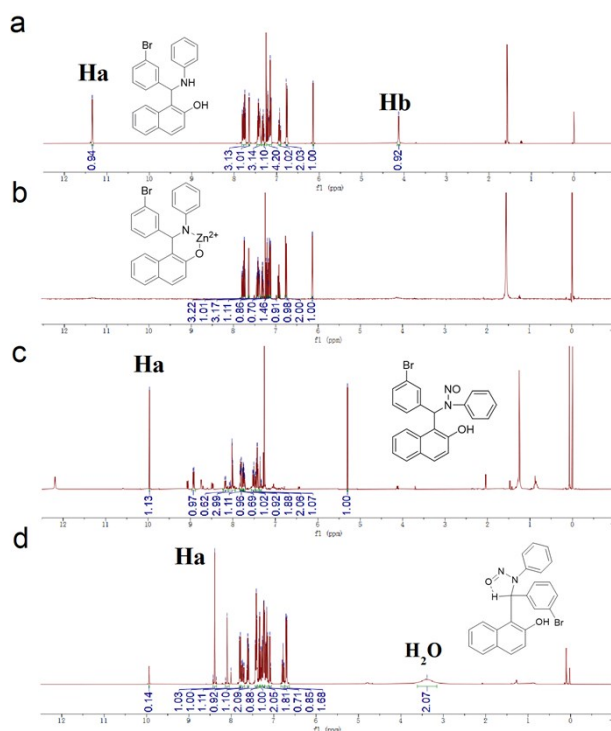

Fig. S4 Proposed response mechanism for LJ-1/ $\text{Zn}^{2+}$  with NO on  $^1\text{H}$  NMR. a) LJ-1; b) LJ-1/ $\text{Zn}^{2+}$  complex; c) LJ-1/ $\text{Zn}^{2+}$  complex exposed to NO at 1 h; d) LJ-1/ $\text{Zn}^{2+}$  complex exposed to NO at 2 h.
